# Supplementary material for: Intracellular Trafficking and Persistence of Acinetobacter baumannii Requires Transcription Factor EB
Source: PubMed Central journal article supplement (PMC5874439; doi:10.1128/msphere.00106-18), 2018-03-28
Supplement: sph002182506sf1.pdf [file sph002182506sf1.pdf]

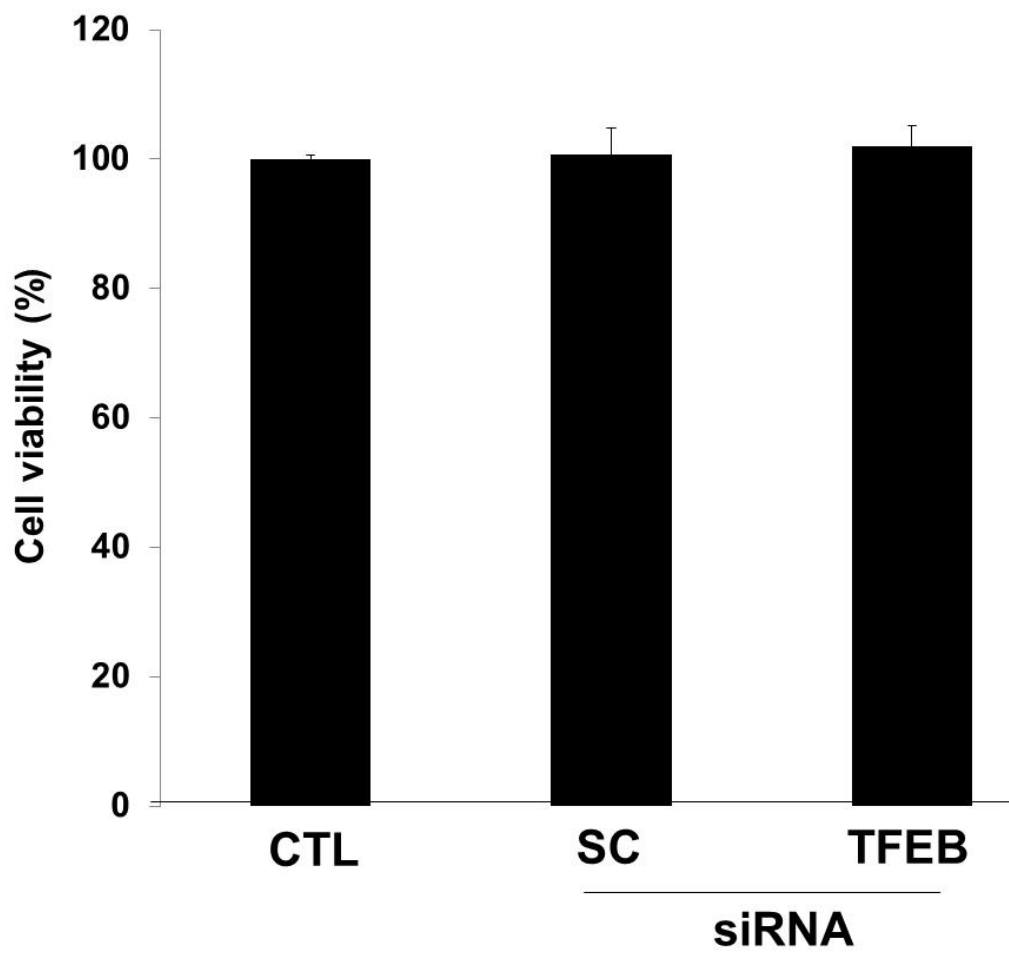

Figure S1
